# Supplementary material
Source: HighWire-hosted journal article supplement (https://gut.bmj.com/content/gutjnl-2024-332177)
Supplement: inline-supplementary-material-1 [file inline-supplementary-material-1.pdf]

**Table 1.** Most frequent amino acids at known RAS positions in reference sequences from all known assigned, provisionally assigned or unassigned HCV genotype (GT) subtypes (recovered from never-treated patients). Amino acids conferring reduced susceptibility to the corresponding DAAs were defined according to the “EASL recommendations on treatment of hepatitis C: Final update of the series 2020”. Reference strains were obtained from [https://ictv.global/sg\\_wiki/flaviviridae/hepacivirus/table1](https://ictv.global/sg_wiki/flaviviridae/hepacivirus/table1). Amino acids conferring reduced susceptibility to the DAAs targeting the corresponding regions are shown in bold red. Polymorphisms not reported to be associated with reduced susceptibility to the corresponding DAAs are shown in bold black. Other amino acids are shown in gray. \*For these tentatively assigned subtypes, only partial sequences are available in the databases.

| HCV genotype 1 subtypes         |               |    |    |          |    |    |          |          |     |     |     |     |     |          |     |                |    |          |    |          |          |    |    |          |    |                |          |     |     |     |     |          |     |     |   |
|---------------------------------|---------------|----|----|----------|----|----|----------|----------|-----|-----|-----|-----|-----|----------|-----|----------------|----|----------|----|----------|----------|----|----|----------|----|----------------|----------|-----|-----|-----|-----|----------|-----|-----|---|
| HCV subtype reference sequences | NS3 positions |    |    |          |    |    |          |          |     |     |     |     |     |          |     | NS5A positions |    |          |    |          |          |    |    |          |    | NS5B positions |          |     |     |     |     |          |     |     |   |
|                                 | 36            | 41 | 43 | 54       | 55 | 56 | 80       | 122      | 155 | 156 | 158 | 166 | 168 | 170      | 175 | 24             | 26 | 28       | 29 | 30       | 31       | 32 | 38 | 58       | 62 | 92             | 93       | 150 | 159 | 206 | 282 | 316      | 320 | 321 |   |
| GT-1a<br>1a_M62321              | V             | Q  | F  | T        | V  | Y  | Q        | S        | R   | A   | V   | A   | D   | I        | L   | K              | K  | M        | P  | Q        | L        | P  | S  | <b>H</b> | E  | A              | Y        | E   | L   | Q   | S   | C        | L   | V   |   |
| GT-1b<br>1b_M58335              | V             | Q  | F  | T        | V  | Y  | Q        | S        | R   | A   | V   | A   | D   | I        | M   | <b>Q</b>       | K  | <b>L</b> | P  | Q        | L        | P  | S  | P        | Q  | A              | Y        | E   | L   | N   | S   | <b>N</b> | L   | V   |   |
| GT-1c<br>1d_AY051292            | V             | Q  | F  | T        | V  | Y  | Q        | <b>N</b> | R   | A   | V   | A   | D   | <b>V</b> | L   | K              | K  | <b>V</b> | P  | Q        | L        | P  | S  | P        | N  | A              | Y        | E   | L   | K   | S   | C        | L   | V   |   |
| GT-1d<br>1d_KJ439768            | V             | Q  | F  | <b>S</b> | V  | Y  | <b>K</b> | S        | R   | A   | V   | A   | D   | <b>V</b> | M   | K              | X  | <b>L</b> | P  | <b>R</b> | <b>M</b> | P  | S  | P        | Q  | A              | Y        | E   | L   | N   | S   | C        | L   | V   |   |
| GT-1e<br>1e_KC248194            | <b>L</b>      | Q  | F  | <b>S</b> | V  | Y  | Q        | <b>N</b> | R   | A   | V   | A   | D   | <b>V</b> | L   | K              | K  | M        | P  | Q        | <b>M</b> | P  | S  | <b>S</b> | Q  | <b>T</b>       | Y        | E   | L   | D   | S   | C        | L   | V   |   |
| GT-1f*<br>1f_L38371             | -             | -  | -  | -        | -  | -  | -        | -        | -   | -   | -   | -   | -   | -        | -   | -              | -  | -        | -  | -        | -        | -  | -  | -        | -  | -              | -        | -   | -   | -   | -   | S        | C   | L   | V |
| GT-1g<br>1g_AM910652            | V             | Q  | F  | <b>S</b> | V  | Y  | Q        | S        | R   | A   | V   | A   | D   | <b>V</b> | L   | <b>S</b>       | K  | <b>L</b> | P  | <b>R</b> | L        | P  | S  | P        | Q  | A              | <b>F</b> | E   | L   | K   | S   | C        | L   | V   |   |
| GT-1h<br>1h_KC248198            | V             | Q  | F  | T        | V  | Y  | Q        | S        | R   | A   | V   | A   | D   | <b>V</b> | M   | <b>Q</b>       | K  | <b>L</b> | P  | <b>R</b> | L        | P  | S  | P        | N  | A              | Y        | S   | L   | K   | S   | C        | L   | V   |   |
| GT-1i<br>1i_KJ439772            | V             | Q  | F  | T        | V  | Y  | Q        | S        | R   | A   | V   | A   | D   | <b>V</b> | M   | <b>Q</b>       | K  | <b>L</b> | P  | <b>R</b> | L        | P  | S  | P        | Q  | A              | Y        | E   | L   | N   | S   | C        | L   | V   |   |

|                               |          |   |   |   |   |   |          |          |          |   |   |   |          |          |          |          |   |          |   |          |          |   |   |          |          |   |          |   |   |          |   |          |   |          |
|-------------------------------|----------|---|---|---|---|---|----------|----------|----------|---|---|---|----------|----------|----------|----------|---|----------|---|----------|----------|---|---|----------|----------|---|----------|---|---|----------|---|----------|---|----------|
| GT-1j<br>1j_KJ439773          | V        | Q | F | T | V | Y | Q        | <b>N</b> | R        | A | V | A | D        | <b>V</b> | L        | K        | K | M        | P | Q        | L        | P | S | P        | E        | A | Y        | E | L | N        | S | C        | L | V        |
| GT-1k<br>1k_KJ439774          | V        | Q | F | T | V | Y | Q        | <b>T</b> | R        | A | V | A | D        | I        | L        | K        | K | <b>A</b> | P | Q        | L        | P | S | P        | E        | A | Y        | E | L | N        | S | C        | L | <b>I</b> |
| GT-1l<br>1l_KC248197          | V        | Q | F | T | V | Y | <b>L</b> | S        | R        | A | V | A | D        | I        | L        | <b>S</b> | K | M        | P | Q        | <b>M</b> | P | S | P        | Q        | A | Y        | E | L | K        | S | C        | L | V        |
| GT-1m<br>1l_KJ439778          | V        | Q | F | T | V | Y | Q        | S        | R        | A | V | A | D        | I        | L        | K        | K | M        | P | Q        | <b>M</b> | P | S | P        | D        | A | <b>C</b> | E | L | N        | S | C        | L | V        |
| GT-1n<br>1l_KJ439775          | V        | Q | F | T | V | F | <b>L</b> | S        | R        | A | V | A | D        | I        | L        | K        | K | M        | P | Q        | L        | P | S | P        | D        | A | Y        | E | L | N        | S | C        | L | <b>I</b> |
| GT-1o<br>1l_KJ439779          | V        | Q | F | T | V | Y | Q        | <b>T</b> | R        | A | V | A | D        | V        | L        | K        | K | M        | P | Q        | <b>M</b> | P | S | P        | D        | A | Y        | E | L | K        | S | C        | L | V        |
| Unassigned GT-1<br>1_AJ851228 | V        | Q | F | T | V | Y | Q        | <b>T</b> | R        | A | V | A | D        | <b>V</b> | <b>M</b> | K        | K | <b>L</b> | P | <b>S</b> | <b>V</b> | P | S | <b>P</b> | E        | A | <b>H</b> | E | L | Q        | S | C        | L | V        |
| Unassigned GT-1<br>1_KC248195 | V        | Q | F | T | V | Y | Q        | <b>T</b> | R        | A | V | A | D        | <b>V</b> | L        | <b>G</b> | K | <b>A</b> | P | <b>K</b> | <b>I</b> | P | S | <b>P</b> | <b>Q</b> | A | Y        | E | L | <b>N</b> | S | C        | L | V        |
| Unassigned GT-1<br>1_HQ537007 | <b>M</b> | Q | F | T | V | X | <b>L</b> | <b>G</b> | X        | A | V | A | D        | I        | L        | K        | K | <b>F</b> | P | Q        | <b>M</b> | P | S | <b>P</b> | <b>Q</b> | A | Y        | E | L | <b>K</b> | S | C        | L | V        |
| Unassigned GT-1<br>1_KJ439780 | V        | Q | F | T | V | Y | <b>K</b> | <b>G</b> | R        | A | V | A | D        | I        | L        | K        | K | <b>L</b> | P | Q        | <b>M</b> | P | S | <b>P</b> | <b>D</b> | A | Y        | E | L | <b>K</b> | S | C        | L | V        |
| Unassigned GT-1<br>1_KJ439776 | V        | Q | F | T | V | Y | <b>L</b> | S        | R        | A | V | A | D        | <b>V</b> | L        | <b>A</b> | K | M        | P | <b>K</b> | <b>M</b> | P | S | <b>P</b> | <b>Q</b> | A | Y        | E | L | <b>K</b> | S | C        | L | V        |
| Unassigned GT-1<br>1_KJ439777 | V        | Q | F | T | V | Y | Q        | S        | <b>K</b> | A | V | A | D        | <b>V</b> | L        | K        | K | <b>A</b> | P | <b>H</b> | L        | P | S | <b>P</b> | E        | A | Y        | E | L | <b>N</b> | S | <b>N</b> | L | V        |
| Unassigned GT-1<br>1_KY348757 | V        | Q | F | T | V | Y | Q        | S        | R        | A | V | A | D        | <b>V</b> | <b>M</b> | K        | K | <b>L</b> | P | <b>L</b> | <b>V</b> | P | S | <b>S</b> | <b>Q</b> | A | <b>H</b> | E | L | <b>N</b> | S | C        | L | V        |
| Unassigned GT-1<br>1_MH921830 | V        | Q | F | T | V | Y | Q        | <b>T</b> | R        | A | V | A | <b>E</b> | <b>V</b> | L        | K        | K | <b>L</b> | P | Q        | L        | P | S | <b>P</b> | <b>Q</b> | A | F        | E | L | <b>S</b> | S | C        | L | V        |

| HCV genotype 2 subtypes         |               |    |    |    |    |    |    |     |     |     |     |     |     |     |     |                |    |    |    |    |    |    |    |    |    |                |    |     |     |     |     |     |     |     |   |   |   |
|---------------------------------|---------------|----|----|----|----|----|----|-----|-----|-----|-----|-----|-----|-----|-----|----------------|----|----|----|----|----|----|----|----|----|----------------|----|-----|-----|-----|-----|-----|-----|-----|---|---|---|
| HCV subtype reference sequences | NS3 positions |    |    |    |    |    |    |     |     |     |     |     |     |     |     | NS5A positions |    |    |    |    |    |    |    |    |    | NS5B positions |    |     |     |     |     |     |     |     |   |   |   |
|                                 | 36            | 41 | 43 | 54 | 55 | 56 | 80 | 122 | 155 | 156 | 158 | 166 | 168 | 170 | 175 | 24             | 26 | 28 | 29 | 30 | 31 | 32 | 38 | 58 | 62 | 92             | 93 | 150 | 159 | 206 | 282 | 316 | 320 | 321 |   |   |   |
| GT-2a<br>2a_AB047639            | L             | Q  | F  | T  | V  | Y  | G  | K   | R   | A   | V   | S   | D   | I   | L   | T              | K  | F  | P  | K  | L  | P  | S  | P  | N  | C              | Y  | A   | L   | K   | S   | C   | L   | V   |   |   |   |
| GT-2b<br>2b_AB030907            | L             | Q  | F  | T  | V  | Y  | G  | K   | R   | A   | V   | S   | D   | I   | L   | S              | K  | L  | P  | K  | M  | P  | S  | S  | N  | C              | Y  | A   | L   | K   | S   | C   | L   | V   |   |   |   |
| GT-2c<br>2c_D50409              | L             | Q  | F  | T  | V  | F  | G  | R   | R   | A   | V   | S   | D   | I   | L   | S              | K  | F  | P  | R  | L  | P  | S  | P  | N  | C              | Y  | A   | L   | Q   | S   | C   | L   | V   |   |   |   |
| GT-2d<br>2d_JF735114            | L             | Q  | F  | T  | V  | F  | G  | R   | R   | X   | V   | S   | D   | I   | L   | S              | K  | L  | P  | K  | L  | P  | S  | P  | N  | C              | Y  | I   | L   | R   | S   | C   | L   | V   |   |   |   |
| GT-2e<br>2e_JF735120            | L             | Q  | F  | A  | V  | F  | G  | R   | R   | A   | V   | S   | D   | I   | L   | S              | K  | F  | P  | K  | M  | P  | S  | S  | N  | S              | Y  | S   | L   | R   | S   | C   | L   | V   |   |   |   |
| GT-2f<br>2f_KC844050            | L             | Q  | F  | T  | V  | F  | G  | R   | R   | A   | V   | S   | D   | I   | L   | S              | K  | F  | P  | K  | M  | P  | S  | P  | N  | C              | Y  | A   | L   | R   | S   | C   | L   | V   |   |   |   |
| GT-2g*<br>2g_X93323             | -             | -  | -  | -  | -  | -  | -  | -   | -   | -   | -   | -   | -   | -   | -   | -              | -  | -  | -  | -  | -  | -  | -  | -  | -  | -              | -  | -   | -   | -   | -   | -   | S   | -   | - | - |   |
| GT-2h*<br>2h_X93327             | -             | -  | -  | -  | -  | -  | -  | -   | -   | -   | -   | -   | -   | -   | -   | -              | -  | -  | -  | -  | -  | -  | -  | -  | -  | -              | -  | -   | -   | -   | -   | -   | -   | T   | - | - | - |
| GT-2i<br>2i_DQ155561            | L             | Q  | F  | T  | V  | F  | G  | R   | R   | A   | V   | S   | D   | I   | L   | S              | K  | F  | P  | K  | M  | P  | S  | P  | N  | C              | Y  | A   | L   | R   | S   | C   | L   | V   |   |   |   |
| GT-2j<br>2j_JF735113            | L             | Q  | F  | T  | V  | F  | G  | R   | R   | A   | V   | S   | D   | I   | L   | S              | K  | F  | P  | K  | M  | P  | S  | P  | X  | C              | Y  | A   | L   | R   | S   | C   | L   | V   |   |   |   |
| GT-2k<br>2k_AB031663            | L             | Q  | F  | T  | V  | F  | G  | R   | R   | A   | I   | S   | D   | I   | L   | S              | K  | L  | P  | K  | M  | P  | S  | P  | V  | C              | Y  | T   | L   | R   | S   | C   | L   | V   |   |   |   |
| GT-2l<br>2l_KC197240            | L             | Q  | F  | T  | V  | Y  | G  | R   | R   | A   | V   | A   | D   | V   | L   | S              | K  | L  | P  | K  | L  | P  | S  | P  | Y  | S              | Y  | A   | L   | N   | S   | C   | L   | V   |   |   |   |

|                               |   |   |   |   |   |   |   |   |   |   |   |   |   |   |   |   |   |   |   |   |   |   |   |   |   |   |   |   |   |   |   |   |   |   |   |   |   |   |
|-------------------------------|---|---|---|---|---|---|---|---|---|---|---|---|---|---|---|---|---|---|---|---|---|---|---|---|---|---|---|---|---|---|---|---|---|---|---|---|---|---|
| GT-2m<br>2m_JX227967          | L | Q | F | T | V | F | G | R | R | A | V | S | D | I | L | S | K | L | P | K | M | P | S | P | A | S | Y | A | L | Q | S | C | L | V |   |   |   |   |
| GT-2n*<br>2n_L44602           | - | - | - | - | - | - | - | - | - | - | - | - | - | - | - | - | - | - | - | - | - | - | - | - | - | - | - | - | - | - | - | - | S | C | L | V |   |   |
| GT-2o*<br>2o_L38373           | - | - | - | - | - | - | - | - | - | - | - | - | - | - | - | - | - | - | - | - | - | - | - | - | - | - | - | - | - | - | - | - | - | S | C | L | V |   |
| GT-2p*<br>2p_L44601           | - | - | - | - | - | - | - | - | - | - | - | - | - | - | - | - | - | - | - | - | - | - | - | - | - | - | - | - | - | - | - | - | - | - | S | C | L | V |
| GT-2q<br>2q_FN666429          | L | Q | F | T | V | F | G | R | R | A | V | S | D | I | L | S | K | L | P | K | M | P | S | P | N | C | Y | A | L | R | S | C | L | V |   |   |   |   |
| GT-2r<br>2r_JF735115          | L | Q | F | T | V | F | G | T | R | A | V | S | D | I | L | S | K | F | P | K | M | P | S | P | N | C | Y | V | L | R | S | C | L | I |   |   |   |   |
| GT-2s*<br>2s_HM777332         | - | - | - | - | - | - | - | - | - | - | - | - | - | - | - | - | - | - | - | - | - | - | - | - | - | - | - | - | - | - | - | - | - | - | S | C | L | V |
| GT-2t<br>2t_KC197238          | L | Q | F | T | V | F | G | R | R | A | V | A | D | I | L | S | K | L | P | K | L | P | S | P | T | C | Y | L | L | Q | S | C | L | V |   |   |   |   |
| GT-2u<br>2u_JF735112          | L | Q | F | T | V | Y | G | K | R | A | V | A | D | I | L | S | K | F | P | K | M | P | S | P | N | C | Y | M | L | Q | S | C | L | V |   |   |   |   |
| GT-2v<br>2v_MW041295          | L | Q | F | T | V | F | G | R | R | A | V | S | D | I | L | S | K | L | P | K | M | P | S | P | V | C | Y | A | L | R | S | C | L | V |   |   |   |   |
| Unassigned GT-2<br>2_JF735119 | L | Q | F | T | V | Y | G | X | R | A | V | S | D | I | L | S | K | C | P | K | M | P | S | P | N | C | Y | A | L | Q | S | C | L | V |   |   |   |   |
| Unassigned GT-2<br>2_JF735110 | L | Q | F | T | V | F | G | R | R | A | V | S | D | I | L | S | K | F | P | X | M | P | S | P | N | C | Y | A | L | E | S | C | L | V |   |   |   |   |
| Unassigned GT-2<br>2_JF735117 | L | Q | F | X | V | Y | G | R | R | A | V | S | D | I | L | S | K | L | P | K | M | P | S | P | N | C | Y | A | L | Q | S | C | L | V |   |   |   |   |
| Unassigned GT-2<br>2_JF735116 | L | Q | F | T | V | Y | G | R | R | A | V | A | D | I | L | S | K | L | P | K | L | P | S | P | N | C | Y | A | L | R | S | C | L | V |   |   |   |   |
| Unassigned GT-2<br>2_JF735118 | L | Q | F | T | V | F | G | R | R | A | V | S | D | I | L | S | K | F | P | K | L | P | S | P | N | C | Y | A | L | K | S | C | L | V |   |   |   |   |

|                                       |   |   |   |   |   |          |   |          |   |   |   |   |   |   |   |          |   |   |   |          |          |   |   |   |          |   |   |   |   |          |   |   |   |   |
|---------------------------------------|---|---|---|---|---|----------|---|----------|---|---|---|---|---|---|---|----------|---|---|---|----------|----------|---|---|---|----------|---|---|---|---|----------|---|---|---|---|
| <b>Unassigned GT-2<br/>2_KC197236</b> | L | Q | F | T | V | <b>F</b> | G | <b>R</b> | R | A | V | S | D | I | L | <b>S</b> | K | L | P | <b>K</b> | L        | P | S | P | N        | C | Y | A | L | <b>N</b> | S | C | L | V |
| <b>Unassigned GT-2<br/>2_KC197237</b> | L | Q | F | T | V | Y        | G | <b>T</b> | R | A | V | S | D | I | L | <b>S</b> | K | F | P | <b>K</b> | <b>M</b> | P | S | P | <b>D</b> | C | Y | A | L | K        | S | C | L | V |
| <b>Unassigned GT-2<br/>2_KC197239</b> | L | Q | F | T | V | <b>F</b> | G | <b>R</b> | R | A | V | S | D | I | L | <b>S</b> | K | F | P | <b>K</b> | L        | P | S | P | N        | C | Y | A | L | <b>N</b> | S | C | L | V |
| <b>Unassigned GT-2<br/>2_MW041294</b> | L | Q | F | T | V | <b>F</b> | G | <b>R</b> | R | A | V | S | D | I | L | <b>S</b> | K | L | P | <b>K</b> | L        | P | S | P | N        | C | Y | A | L | <b>R</b> | S | C | L | V |

| HCV genotype 3 subtypes         |               |    |    |    |    |    |    |     |     |     |     |     |     |     |     |                |    |    |    |    |    |    |    |    |    |                |    |     |     |     |     |     |     |     |
|---------------------------------|---------------|----|----|----|----|----|----|-----|-----|-----|-----|-----|-----|-----|-----|----------------|----|----|----|----|----|----|----|----|----|----------------|----|-----|-----|-----|-----|-----|-----|-----|
| HCV subtype reference sequences | NS3 positions |    |    |    |    |    |    |     |     |     |     |     |     |     |     | NS5A positions |    |    |    |    |    |    |    |    |    | NS5B positions |    |     |     |     |     |     |     |     |
|                                 | 36            | 41 | 43 | 54 | 55 | 56 | 80 | 122 | 155 | 156 | 158 | 166 | 168 | 170 | 175 | 24             | 26 | 28 | 29 | 30 | 31 | 32 | 38 | 58 | 62 | 92             | 93 | 150 | 159 | 206 | 282 | 316 | 320 | 321 |
| GT-3a<br>3a_D28917              | L             | Q  | F  | T  | V  | Y  | Q  | S   | R   | A   | V   | A   | Q   | I   | P   | S              | K  | M  | P  | A  | L  | P  | S  | P  | S  | E              | Y  | A   | L   | K   | S   | C   | L   | V   |
| GT-3b<br>3b_D49374              | L             | Q  | F  | T  | V  | Y  | Q  | S   | R   | A   | V   | A   | Q   | I   | L   | S              | K  | M  | P  | K  | V  | P  | S  | P  | D  | E              | Y  | A   | L   | K   | S   | C   | L   | V   |
| GT-3d<br>3d_KJ470619            | L             | Q  | F  | T  | V  | Y  | Q  | S   | R   | A   | V   | A   | Q   | I   | P   | S              | K  | M  | P  | K  | M  | P  | S  | P  | S  | E              | Y  | S   | L   | E   | S   | C   | L   | V   |
| GT-3e<br>3e_KJ470618            | L             | Q  | F  | T  | V  | Y  | Q  | S   | R   | A   | V   | G   | Q   | I   | L   | S              | K  | M  | P  | K  | L  | P  | S  | P  | V  | E              | Y  | S   | L   | K   | S   | C   | L   | V   |
| GT-3g<br>3g_JF735123            | L             | Q  | F  | T  | V  | Y  | Q  | S   | R   | A   | V   | S   | Q   | I   | L   | T              | K  | M  | P  | K  | M  | P  | S  | P  | Y  | E              | Y  | S   | L   | K   | S   | C   | L   | V   |
| GT-3h<br>3h_JF735121            | L             | Q  | F  | T  | V  | Y  | Q  | S   | R   | A   | I   | S   | Q   | I   | L   | S              | K  | M  | P  | A  | L  | P  | S  | P  | M  | E              | Y  | S   | L   | D   | S   | C   | L   | V   |
| GT-3i<br>3i_JX227955            | L             | Q  | F  | T  | V  | Y  | Q  | S   | R   | A   | V   | A   | Q   | V   | L   | S              | K  | M  | P  | R  | L  | P  | S  | P  | M  | E              | Y  | T   | L   | E   | S   | C   | L   | V   |
| GT-3k<br>3k_JF735122            | L             | Q  | F  | T  | V  | Y  | Q  | S   | R   | A   | V   | A   | Q   | I   | L   | G              | K  | M  | P  | K  | M  | P  | S  | P  | L  | E              | Y  | H   | L   | K   | S   | C   | L   | V   |
| Unassigned GT-3<br>3_JF735124   | L             | Q  | F  | S  | V  | Y  | Q  | S   | R   | A   | V   | S   | Q   | V   | L   | S              | K  | M  | P  | S  | L  | P  | S  | P  | T  | E              | Y  | Q   | L   | A   | S   | C   | L   | V   |

| HCV genotype 4 subtypes         |               |    |    |    |    |    |    |     |     |     |     |     |     |     |     |                |    |    |    |    |    |    |    |    |    |                |    |     |     |     |     |     |     |     |   |
|---------------------------------|---------------|----|----|----|----|----|----|-----|-----|-----|-----|-----|-----|-----|-----|----------------|----|----|----|----|----|----|----|----|----|----------------|----|-----|-----|-----|-----|-----|-----|-----|---|
| HCV subtype reference sequences | NS3 positions |    |    |    |    |    |    |     |     |     |     |     |     |     |     | NS5A positions |    |    |    |    |    |    |    |    |    | NS5B positions |    |     |     |     |     |     |     |     |   |
|                                 | 36            | 41 | 43 | 54 | 55 | 56 | 80 | 122 | 155 | 156 | 158 | 166 | 168 | 170 | 175 | 24             | 26 | 28 | 29 | 30 | 31 | 32 | 38 | 58 | 62 | 92             | 93 | 150 | 159 | 206 | 282 | 316 | 320 | 321 |   |
| GT-4a<br>4a_Y11604              | L             | Q  | F  | T  | V  | Y  | Q  | T   | R   | A   | V   | A   | D   | V   | L   | K              | K  | V  | P  | L  | M  | P  | S  | P  | D  | A              | Y  | A   | L   | T   | T   | C   | L   | V   |   |
| GT-4b<br>4b_FJ462435            | L             | Q  | F  | T  | V  | X  | Q  | S   | R   | A   | V   | A   | D   | V   | L   | K              | K  | L  | P  | S  | M  | P  | E  | P  | T  | A              | H  | E   | K   | L   | S   | C   | L   | V   |   |
| GT-4c<br>4c_FJ462436            | L             | Q  | F  | T  | V  | Y  | Q  | T   | R   | A   | V   | A   | D   | V   | L   | K              | K  | L  | P  | R  | M  | P  | S  | P  | Q  | A              | Y  | E   | L   | S   | S   | C   | L   | V   |   |
| GT-4d<br>4d_FJ462437            | L             | Q  | F  | T  | V  | Y  | Q  | T   | R   | A   | V   | A   | D   | V   | L   | K              | K  | L  | P  | R  | M  | P  | S  | T  | E  | A              | Y  | E   | L   | N   | S   | C   | L   | V   |   |
| GT-4e*<br>4e_L29590             | -             | -  | -  | -  | -  | -  | -  | -   | -   | -   | -   | -   | -   | -   | -   | -              | -  | -  | -  | -  | -  | -  | -  | -  | -  | -              | -  | -   | -   | -   | -   | S   | C   | L   | V |
| GT-4f<br>4f_EU392175            | L             | Q  | F  | T  | V  | Y  | Q  | T   | R   | A   | V   | A   | D   | V   | L   | K              | K  | L  | P  | Q  | M  | P  | S  | P  | Q  | A              | Y  | Q   | L   | K   | S   | C   | L   | V   |   |
| GT-4g<br>4g_FJ462432            | L             | Q  | F  | T  | V  | Y  | Q  | T   | R   | A   | V   | A   | D   | V   | L   | K              | K  | L  | P  | L  | M  | P  | S  | P  | S  | A              | H  | E   | L   | K   | S   | C   | X   | V   |   |
| GT-4h<br>4h_L29611              | -             | -  | -  | -  | -  | -  | -  | -   | -   | -   | -   | -   | -   | -   | -   | -              | -  | -  | -  | -  | -  | -  | -  | -  | -  | -              | -  | -   | -   | -   | -   | S   | C   | L   | V |
| GT-4i<br>4i_L36437              | -             | -  | -  | -  | -  | -  | -  | -   | -   | -   | -   | -   | -   | -   | -   | -              | -  | -  | -  | -  | -  | -  | -  | -  | -  | -              | -  | -   | -   | -   | -   | S   | C   | L   | V |
| GT-4j<br>4j_L36438              | -             | -  | -  | -  | -  | -  | -  | -   | -   | -   | -   | -   | -   | -   | -   | -              | -  | -  | -  | -  | -  | -  | -  | -  | -  | -              | -  | -   | -   | -   | -   | S   | C   | L   | V |
| GT-4k<br>4k_FJ462438            | L             | Q  | F  | T  | V  | Y  | Q  | T   | R   | A   | V   | A   | D   | V   | L   | K              | K  | L  | P  | R  | M  | P  | S  | P  | E  | A              | Y  | E   | L   | K   | S   | C   | L   | V   |   |
| GT-4l<br>4l_FJ839870            | L             | Q  | F  | T  | V  | Y  | Q  | T   | R   | A   | V   | A   | D   | V   | L   | K              | K  | L  | P  | R  | M  | P  | S  | P  | E  | A              | Y  | E   | L   | T   | S   | C   | L   | V   |   |

|                                |   |   |   |   |   |   |   |   |   |   |   |   |   |   |   |   |   |   |   |   |   |   |   |   |   |   |   |   |   |   |   |   |   |   |
|--------------------------------|---|---|---|---|---|---|---|---|---|---|---|---|---|---|---|---|---|---|---|---|---|---|---|---|---|---|---|---|---|---|---|---|---|---|
| GT-4m<br>4m_FJ462433           | X | Q | F | T | V | Y | Q | S | R | A | V | A | D | I | L | K | K | L | P | S | M | P | S | P | R | A | Y | E | L | D | S | C | L | V |
| GT-4n<br>4n_FJ462441           | L | Q | F | T | V | Y | Q | T | R | A | V | A | D | V | L | K | K | L | P | R | M | P | S | T | E | A | Y | E | L | S | S | C | L | V |
| GT-4o<br>4o_FJ462440           | L | Q | F | T | V | Y | X | T | R | Q | V | A | D | V | L | K | K | M | X | T | M | P | S | P | E | A | Y | E | L | A | S | C | L | V |
| GT-4p<br>4p_FJ462431           | L | Q | F | T | V | Y | Q | T | R | A | V | A | D | V | L | K | K | L | P | R | M | P | S | P | E | A | Y | E | L | N | S | C | L | V |
| GT-4q<br>4q_FJ462434           | L | Q | F | T | V | Y | Q | N | R | A | V | A | D | V | L | K | K | L | P | R | M | P | S | P | E | A | Y | E | L | A | S | C | L | V |
| GT-4r<br>4r_FJ462439           | L | Q | F | T | V | Y | Q | T | R | A | V | A | D | V | L | K | K | I | P | R | L | P | S | P | N | A | Y | E | L | K | S | C | L | V |
| GT-4s<br>4s_JF735136           | L | Q | F | T | V | Y | Q | N | R | A | V | A | T | V | L | K | K | L | P | R | L | P | S | P | E | A | Y | E | L | D | S | C | L | V |
| GT-4t<br>4t_FJ839869           | L | Q | F | T | V | Y | Q | T | R | A | V | A | D | V | L | K | K | L | P | R | M | P | S | P | E | A | Y | E | L | A | S | C | L | V |
| GT-4v<br>4v_JX227959           | L | Q | F | T | V | Y | Q | N | R | A | V | A | D | V | L | K | K | L | P | R | M | P | S | P | E | A | Y | E | L | T | S | C | L | V |
| GT-4w3<br>4w3_FJ025855         | L | Q | F | T | V | Y | Q | T | R | A | V | A | D | V | L | K | K | M | P | S | M | P | S | P | E | A | S | E | L | K | S | C | L | V |
| Unassigned GT-4<br>4_JX227964  | L | Q | F | T | V | Y | Q | T | R | A | V | S | D | V | L | K | K | L | P | R | M | P | S | P | E | A | Y | E | L | K | S | C | L | V |
| Unassigned GT-4<br>44_FJ025854 | L | Q | F | T | V | Y | Q | T | R | A | V | A | D | V | L | K | K | L | P | A | M | P | S | P | D | A | T | E | L | K | S | C | L | V |
| Unassigned GT-4<br>44_JF735127 | L | Q | F | T | V | F | Q | T | R | A | V | A | D | V | L | K | K | L | P | L | M | P | S | P | D | A | H | E | L | R | S | C | L | V |
| Unassigned GT-4<br>44_JF735132 | L | Q | F | T | V | Y | Q | S | R | A | V | A | D | I | L | K | K | L | P | R | M | P | S | S | E | A | Y | E | L | N | S | C | L | V |
| Unassigned GT-4<br>44_JF735131 | L | Q | F | T | V | Y | Q | T | R | A | V | A | D | V | L | K | K | V | P | R | M | P | S | P | E | A | Y | E | L | A | S | C | L | V |



|                                |   |   |   |   |   |   |   |   |   |   |   |   |   |   |   |   |   |   |   |   |   |   |   |   |   |   |   |   |   |   |   |   |   |   |
|--------------------------------|---|---|---|---|---|---|---|---|---|---|---|---|---|---|---|---|---|---|---|---|---|---|---|---|---|---|---|---|---|---|---|---|---|---|
| Unassigned GT-4<br>44_JF735130 | L | Q | F | T | V | Y | Q | N | R | A | I | A | E | V | L | K | K | L | P | R | M | P | S | P | E | A | S | E | L | S | S | C | L | V |
| Unassigned GT-4<br>44_JF735129 | L | Q | F | T | X | Y | Q | T | R | A | V | A | D | V | L | K | K | M | P | R | L | P | S | P | N | A | Y | E | L | S | S | C | L | V |
| Unassigned GT-4<br>44_JF735138 | L | Q | F | T | V | Y | Q | T | R | A | V | A | D | V | L | K | K | L | P | L | M | P | S | T | E | A | H | E | L | K | S | C | L | V |
| Unassigned GT-4<br>44_JF735135 | L | Q | F | T | V | Y | Q | T | R | A | V | A | D | V | L | K | K | L | P | R | L | P | S | P | E | A | Y | A | L | N | S | C | L | V |
| Unassigned GT-4<br>44_JF735134 | L | Q | F | T | V | Y | Q | T | R | A | V | A | D | V | L | K | K | L | P | L | M | P | S | P | D | A | Y | E | L | R | S | C | L | V |

| HCV genotype 5 subtypes         |               |    |    |    |    |    |    |     |     |     |     |     |          |          |     |                |    |    |    |    |    |    |    |    |          |                |    |     |     |          |     |     |     |     |
|---------------------------------|---------------|----|----|----|----|----|----|-----|-----|-----|-----|-----|----------|----------|-----|----------------|----|----|----|----|----|----|----|----|----------|----------------|----|-----|-----|----------|-----|-----|-----|-----|
| HCV subtype reference sequences | NS3 positions |    |    |    |    |    |    |     |     |     |     |     |          |          |     | NS5A positions |    |    |    |    |    |    |    |    |          | NS5B positions |    |     |     |          |     |     |     |     |
|                                 | 36            | 41 | 43 | 54 | 55 | 56 | 80 | 122 | 155 | 156 | 158 | 166 | 168      | 170      | 175 | 24             | 26 | 28 | 29 | 30 | 31 | 32 | 38 | 58 | 62       | 92             | 93 | 150 | 159 | 206      | 282 | 316 | 320 | 321 |
| GT-5a<br>5a_AF064490            | L             | Q  | F  | T  | V  | F  | K  | T   | R   | A   | V   | A   | D        | I        | L   | Q              | K  | L  | P  | Q  | L  | P  | S  | P  | T        | A              | T  | S   | L   | K        | S   | C   | L   | V   |
| Unassigned GT-5<br>5_KT595242.1 | L             | Q  | F  | T  | V  | F  | K  | S   | R   | A   | V   | A   | <b>E</b> | <b>V</b> | L   | Q              | K  | L  | P  | Q  | L  | P  | S  | P  | <b>M</b> | A              | T  | S   | L   | <b>R</b> | S   | C   | L   | V   |

| HCV genotype 6 subtypes         |               |    |    |    |    |    |    |     |     |     |     |     |     |     |     |                |    |    |    |    |    |    |    |    |    |                |    |     |     |     |     |     |     |     |
|---------------------------------|---------------|----|----|----|----|----|----|-----|-----|-----|-----|-----|-----|-----|-----|----------------|----|----|----|----|----|----|----|----|----|----------------|----|-----|-----|-----|-----|-----|-----|-----|
| HCV subtype reference sequences | NS3 positions |    |    |    |    |    |    |     |     |     |     |     |     |     |     | NS5A positions |    |    |    |    |    |    |    |    |    | NS5B positions |    |     |     |     |     |     |     |     |
|                                 | 36            | 41 | 43 | 54 | 55 | 56 | 80 | 122 | 155 | 156 | 158 | 166 | 168 | 170 | 175 | 24             | 26 | 28 | 29 | 30 | 31 | 32 | 38 | 58 | 62 | 92             | 93 | 150 | 159 | 206 | 282 | 316 | 320 | 321 |
| GT-6a<br>6a_AY859526            | V             | Q  | F  | T  | V  | Y  | K  | N   | R   | A   | V   | S   | D   | I   | M   | Q              | K  | F  | P  | R  | L  | P  | S  | T  | V  | A              | T  | S   | L   | K   | S   | C   | L   | V   |
| GT-6b<br>6b_D84262              | V             | Q  | F  | T  | V  | Y  | Q  | T   | R   | A   | V   | A   | D   | I   | M   | K              | K  | T  | P  | R  | I  | P  | S  | S  | Q  | A              | T  | S   | L   | K   | S   | C   | L   | V   |
| GT-6c<br>6c_EF424629            | V             | Q  | F  | T  | V  | Y  | Q  | S   | R   | A   | V   | A   | D   | V   | M   | K              | K  | V  | P  | A  | L  | P  | S  | G  | N  | P              | T  | Q   | L   | K   | S   | C   | L   | V   |
| GT-6d<br>6d_D84263              | L             | Q  | F  | T  | V  | Y  | Q  | T   | R   | A   | V   | A   | D   | V   | M   | R              | K  | V  | P  | T  | L  | P  | S  | S  | N  | A              | I  | Q   | L   | K   | S   | C   | L   | V   |
| GT-6e<br>6e_DQ314805            | V             | Q  | F  | T  | V  | Y  | Q  | T   | R   | A   | V   | A   | D   | V   | M   | K              | K  | V  | P  | S  | L  | P  | S  | P  | A  | A              | T  | R   | L   | R   | S   | C   | L   | V   |
| GT-6f<br>6f_DQ835760            | L             | Q  | F  | T  | V  | Y  | Q  | T   | R   | A   | V   | A   | D   | V   | M   | K              | K  | A  | P  | S  | L  | P  | S  | S  | A  | A              | T  | Q   | L   | Q   | S   | C   | L   | V   |
| GT-6g<br>6g_D63822              | L             | Q  | F  | T  | V  | Y  | Q  | N   | R   | A   | V   | A   | D   | V   | M   | K              | K  | M  | P  | S  | L  | P  | S  | P  | S  | A              | T  | S   | L   | K   | S   | C   | L   | V   |
| GT-6h<br>6h_D84265              | V             | Q  | F  | T  | V  | Y  | Q  | N   | R   | A   | V   | S   | D   | A   | M   | K              | K  | V  | P  | A  | L  | P  | S  | P  | E  | A              | T  | S   | L   | K   | S   | C   | L   | V   |
| GT-6i<br>6i_DQ835770            | V             | Q  | F  | T  | V  | Y  | Q  | S   | R   | A   | X   | S   | D   | V   | M   | K              | K  | X  | R  | A  | L  | P  | S  | P  | D  | A              | T  | S   | L   | T   | S   | C   | L   | V   |
| GT-6j<br>6j_DQ835769            | V             | Q  | F  | T  | V  | Y  | Q  | N   | R   | A   | V   | S   | D   | V   | M   | K              | K  | V  | X  | A  | L  | P  | S  | P  | D  | A              | X  | S   | L   | K   | S   | C   | L   | V   |
| GT-6k<br>6k_D84264              | V             | Q  | F  | T  | V  | Y  | Q  | T   | R   | A   | V   | S   | D   | V   | M   | K              | K  | V  | P  | A  | L  | P  | S  | P  | D  | A              | T  | S   | L   | K   | S   | C   | L   | V   |
| GT-6l<br>6l_EF424628            | V             | Q  | F  | T  | V  | Y  | Q  | S   | R   | A   | V   | S   | D   | V   | M   | K              | K  | V  | P  | A  | L  | P  | S  | P  | D  | A              | T  | S   | L   | S   | S   | C   | L   | V   |

|                         |   |   |   |   |   |   |   |   |   |   |   |   |   |   |   |   |   |   |   |   |   |   |   |   |   |   |   |   |   |   |   |   |   |   |
|-------------------------|---|---|---|---|---|---|---|---|---|---|---|---|---|---|---|---|---|---|---|---|---|---|---|---|---|---|---|---|---|---|---|---|---|---|
| GT-6m<br>6m_DQ835767    | V | Q | F | T | V | Y | Q | T | R | A | V | S | D | I | M | K | K | V | P | S | L | P | S | T | V | A | S | S | L | E | S | C | L | V |
| GT-6n<br>6n_DQ835768    | V | Q | F | T | V | Y | Q | N | R | A | V | S | D | V | M | K | K | V | P | S | L | P | S | T | M | A | S | S | L | K | S | C | L | V |
| GT-6o<br>6o_EF424627    | I | Q | F | T | V | Y | Q | T | R | A | V | A | D | V | M | K | K | L | P | A | L | P | S | A | S | A | S | K | L | K | S | C | L | V |
| GT-6p<br>6p_EF424626    | V | Q | F | T | V | Y | Q | T | R | A | V | A | D | V | M | K | K | V | P | S | L | P | S | P | M | A | T | Q | L | K | S | C | L | V |
| GT-6q<br>6q_EF424625    | I | Q | F | X | V | Y | Q | T | R | A | V | D | D | V | M | K | K | V | P | S | L | P | S | P | N | A | T | X | X | K | S | C | L | V |
| GT-6r<br>6r_EU408328    | V | Q | F | T | V | F | Q | T | R | A | V | A | D | V | M | K | K | G | P | A | L | P | S | P | A | A | T | Q | L | S | S | C | L | V |
| GT-6s<br>6s_EU408329    | L | Q | F | T | V | F | Q | T | R | A | V | A | D | V | M | K | R | L | P | S | L | P | S | P | E | A | T | S | L | K | S | C | L | V |
| GT-6t<br>6t_EU246939    | L | Q | F | T | V | F | Q | T | R | A | V | A | D | V | M | K | K | V | P | S | L | T | S | G | N | A | T | R | L | G | S | C | L | V |
| GT-6u<br>6u_EU246940    | V | Q | F | T | V | Y | Q | T | R | A | V | A | D | V | M | K | K | V | P | S | L | T | S | P | H | S | T | R | L | Q | S | C | L | V |
| GT-6v<br>6v_EU798760    | V | Q | F | T | V | Y | Q | T | R | A | V | A | D | V | M | K | R | V | P | S | L | P | X | P | Q | A | S | S | L | K | S | C | L | V |
| GT-6w<br>6w_EU643834    | L | Q | F | T | V | Y | Q | S | R | A | V | A | D | V | M | K | K | F | P | A | L | P | S | P | D | A | T | S | L | K | S | C | L | V |
| GT-6xa<br>6xa5_EU408332 | V | Q | F | T | V | F | Q | T | R | A | V | A | D | V | M | K | K | V | P | S | L | P | S | P | N | A | T | S | L | K | S | C | L | V |
| GT-6xb<br>6xb_KJ567645  | V | Q | F | T | V | Y | Q | T | R | A | V | S | D | V | M | K | K | V | P | A | L | P | S | P | D | A | T | S | L | K | S | C | L | V |
| GT-6xc<br>6xc_KJ567651  | V | Q | F | T | V | Y | Q | T | R | D | V | A | D | V | M | K | K | V | P | A | L | P | S | P | Q | A | T | Q | L | R | S | C | L | V |
| GT-6xd<br>6xd_KM252790  | L | Q | F | T | V | Y | Q | S | R | A | V | A | D | V | M | K | K | F | P | R | L | P | S | P | Q | A | T | S | L | K | S | C | L | V |

|                               |   |   |   |   |   |   |   |   |   |   |   |   |   |   |   |   |   |   |   |   |   |   |   |   |   |   |   |   |   |   |   |   |   |   |
|-------------------------------|---|---|---|---|---|---|---|---|---|---|---|---|---|---|---|---|---|---|---|---|---|---|---|---|---|---|---|---|---|---|---|---|---|---|
| GT-6xe<br>6xe_KM252792        | V | Q | F | T | V | Y | Q | T | R | A | V | S | D | V | M | K | K | V | P | S | L | P | S | T | Q | A | S | S | L | G | S | C | L | V |
| GT-6xf<br>6xf_KJ567646        | L | Q | F | T | V | Y | Q | T | R | A | V | A | D | V | M | K | K | V | P | V | L | P | S | P | A | A | T | Q | L | K | S | C | L | V |
| GT-6xg<br>6xg_MH492361        | V | Q | F | T | V | Y | Q | T | R | A | X | S | D | V | M | K | K | V | P | S | L | P | S | P | E | A | T | S | L | S | S | C | L | V |
| GT-6xh<br>6xh_MG879000        | V | Q | F | T | V | Y | Q | N | R | A | V | T | D | V | M | K | R | V | P | A | M | P | S | P | E | A | T | S | L | K | S | C | L | V |
| GT-6xi<br>6xi_MZ504973        | V | Q | F | T | V | Y | Q | T | R | A | V | S | D | V | M | K | K | V | P | A | L | P | S | P | D | A | T | S | L | K | S | C | L | V |
| GT-6xj<br>6xj_MZ171127        | V | Q | F | T | V | Y | Q | T | R | A | V | S | D | V | M | K | K | V | P | A | L | P | S | P | D | A | T | S | L | R | S | C | L | V |
| Unassigned GT-6<br>6_JX183550 | V | Q | F | T | V | Y | Q | T | R | A | V | S | D | V | M | K | K | V | P | A | L | P | S | P | E | A | T | S | L | K | S | C | L | V |
| Unassigned GT-6<br>6_JX183551 | V | Q | F | T | V | Y | Q | T | R | A | V | S | D | V | M | K | K | V | P | A | L | P | S | P | D | A | T | S | L | K | S | C | L | V |
| Unassigned GT-6<br>6_JX183553 | V | Q | F | T | V | Y | Q | S | R | A | V | S | D | V | M | K | K | V | P | A | L | P | S | P | D | A | T | A | L | K | S | C | L | V |
| Unassigned GT-6<br>6_JX183554 | V | Q | F | T | V | Y | Q | T | R | A | V | S | D | V | M | K | K | V | P | A | L | P | S | P | D | A | T | S | L | E | S | C | L | V |
| Unassigned GT-6<br>6_JX183558 | V | Q | F | T | V | Y | Q | N | R | A | V | S | D | V | M | K | K | V | P | A | L | P | S | P | D | A | T | S | L | K | S | C | L | V |
| Unassigned GT-6<br>6_KJ470620 | I | Q | F | T | V | Y | Q | N | R | A | L | A | D | I | M | K | K | L | P | H | L | P | S | S | D | A | T | S | L | K | S | C | L | V |
| Unassigned GT-6<br>6_KJ470621 | L | Q | F | T | V | Y | Q | N | R | A | V | A | E | I | M | K | K | L | P | S | L | P | S | P | D | P | S | S | F | K | S | C | L | V |
| Unassigned GT-6<br>6_KJ470622 | L | Q | F | T | V | Y | Q | N | R | A | V | A | E | V | M | K | K | L | P | A | L | P | S | P | D | A | S | S | F | K | S | C | L | V |
| Unassigned GT-6<br>6_KJ470623 | M | Q | F | T | V | Y | Q | N | R | A | V | A | D | V | M | K | K | I | P | A | L | P | S | P | A | A | T | S | L | K | S | C | L | V |

|                               |   |   |   |   |   |   |   |   |   |   |   |   |   |   |   |   |   |   |   |   |   |   |   |   |   |   |   |   |   |   |   |   |   |   |
|-------------------------------|---|---|---|---|---|---|---|---|---|---|---|---|---|---|---|---|---|---|---|---|---|---|---|---|---|---|---|---|---|---|---|---|---|---|
| Unassigned GT-6<br>6_KJ470624 | I | Q | F | T | V | Y | Q | N | R | A | V | A | E | I | M | K | K | L | P | R | L | P | S | P | Q | A | T | S | L | R | S | C | L | V |
| Unassigned GT-6<br>6_KJ470625 | I | Q | F | T | V | Y | Q | S | R | A | V | A | D | I | M | K | K | V | P | A | L | P | S | P | I | A | T | S | L | K | S | C | L | V |
| Unassigned GT-6<br>6_KC844039 | L | Q | F | X | X | Y | Q | T | R | A | V | A | D | V | M | K | K | M | P | A | L | P | S | T | Q | A | S | S | L | K | S | C | L | V |
| Unassigned GT-6<br>6_KC844040 | V | Q | F | T | V | F | N | T | R | A | V | S | D | I | M | K | K | L | P | T | L | X | S | S | Q | A | S | S | L | K | S | C | L | V |
| Unassigned GT-6<br>6_KJ567652 | V | Q | F | T | V | Y | Q | T | R | A | V | A | D | V | M | K | K | V | P | S | L | P | S | P | Q | A | T | Q | L | K | S | C | L | V |
| Unassigned GT-6<br>6_KJ567648 | I | Q | F | T | V | Y | Q | T | R | A | V | A | D | V | M | K | K | V | P | A | L | P | S | S | A | A | T | Q | L | K | S | C | L | V |
| Unassigned GT-6<br>6_KJ567650 | V | Q | F | T | V | Y | Q | T | R | A | V | A | D | I | M | K | K | V | P | A | L | P | S | P | Q | A | T | Q | L | K | S | C | L | V |
| Unassigned GT-6<br>6_MG878999 | V | Q | F | T | V | Y | Q | S | R | A | V | A | D | V | M | K | K | F | P | S | L | P | S | S | Q | A | S | S | L | K | S | C | X | V |
| Unassigned GT-6<br>6_MN240359 | V | Q | F | T | V | Y | Q | T | R | A | V | A | D | V | M | K | K | M | P | A | L | P | S | T | Q | A | S | S | L | K | S | C | L | V |

| HCV genotype 7 subtypes            |               |    |    |    |    |    |    |     |     |     |     |     |     |     |     |                |    |    |    |    |    |    |    |    |    |                |    |     |     |     |     |     |     | F   | T | V |
|------------------------------------|---------------|----|----|----|----|----|----|-----|-----|-----|-----|-----|-----|-----|-----|----------------|----|----|----|----|----|----|----|----|----|----------------|----|-----|-----|-----|-----|-----|-----|-----|---|---|
| HCV subtype reference sequences    | NS3 positions |    |    |    |    |    |    |     |     |     |     |     |     |     |     | NS5A positions |    |    |    |    |    |    |    |    |    | NS5B positions |    |     |     |     |     |     |     |     |   |   |
|                                    | 36            | 41 | 43 | 54 | 55 | 56 | 80 | 122 | 155 | 156 | 158 | 166 | 168 | 170 | 175 | 24             | 26 | 28 | 29 | 30 | 31 | 32 | 38 | 58 | 62 | 92             | 93 | 150 | 159 | 206 | 282 | 316 | 320 | 321 |   |   |
| <b>GT-7a</b><br><b>7a_EF108306</b> | L             | Q  | F  | G  | P  | Y  | D  | G   | R   | A   | V   | A   | Q   | V   | M   | K              | K  | L  | P  | S  | L  | P  | S  | P  | L  | S              | H  | A   | L   | K   | S   | C   | L   | V   |   |   |
| <b>GT-7b</b><br><b>7b_KX092342</b> | L             | Q  | F  | S  | V  | Y  | E  | K   | R   | A   | V   | A   | Q   | X   | L   | K              | K  | L  | P  | S  | L  | P  | S  | P  | N  | A              | H  | S   | L   | K   | S   | C   | L   | V   |   |   |

| HCV genotype 8 subtype          |               |    |    |    |    |    |    |     |     |     |     |     |     |     |     |                |    |    |    |    |    |    |    |    |    |                |    |     |     |     |     |     |     |     |
|---------------------------------|---------------|----|----|----|----|----|----|-----|-----|-----|-----|-----|-----|-----|-----|----------------|----|----|----|----|----|----|----|----|----|----------------|----|-----|-----|-----|-----|-----|-----|-----|
| HCV subtype reference sequences | NS3 positions |    |    |    |    |    |    |     |     |     |     |     |     |     |     | NS5A positions |    |    |    |    |    |    |    |    |    | NS5B positions |    |     |     |     |     |     |     |     |
|                                 | 36            | 41 | 43 | 54 | 55 | 56 | 80 | 122 | 155 | 156 | 158 | 166 | 168 | 170 | 175 | 24             | 26 | 28 | 29 | 30 | 31 | 32 | 38 | 58 | 62 | 92             | 93 | 150 | 159 | 206 | 282 | 316 | 320 | 321 |
| GT-8a<br>8a_MH590698            | L             | Q  | F  | T  | V  | Y  | K  | T   | R   | A   | V   | A   | D   | I   | L   | K              | R  | L  | P  | S  | L  | P  | S  | P  | V  | S              | S  | A   | L   | K   | S   | C   | L   | V   |
